# Supplementary material
Source: Springer Nature journal article supplement (https://www.springermedizin.de/resource/supplementary/12967_2011_836_MOESM5_ESM.pdf/9577164)

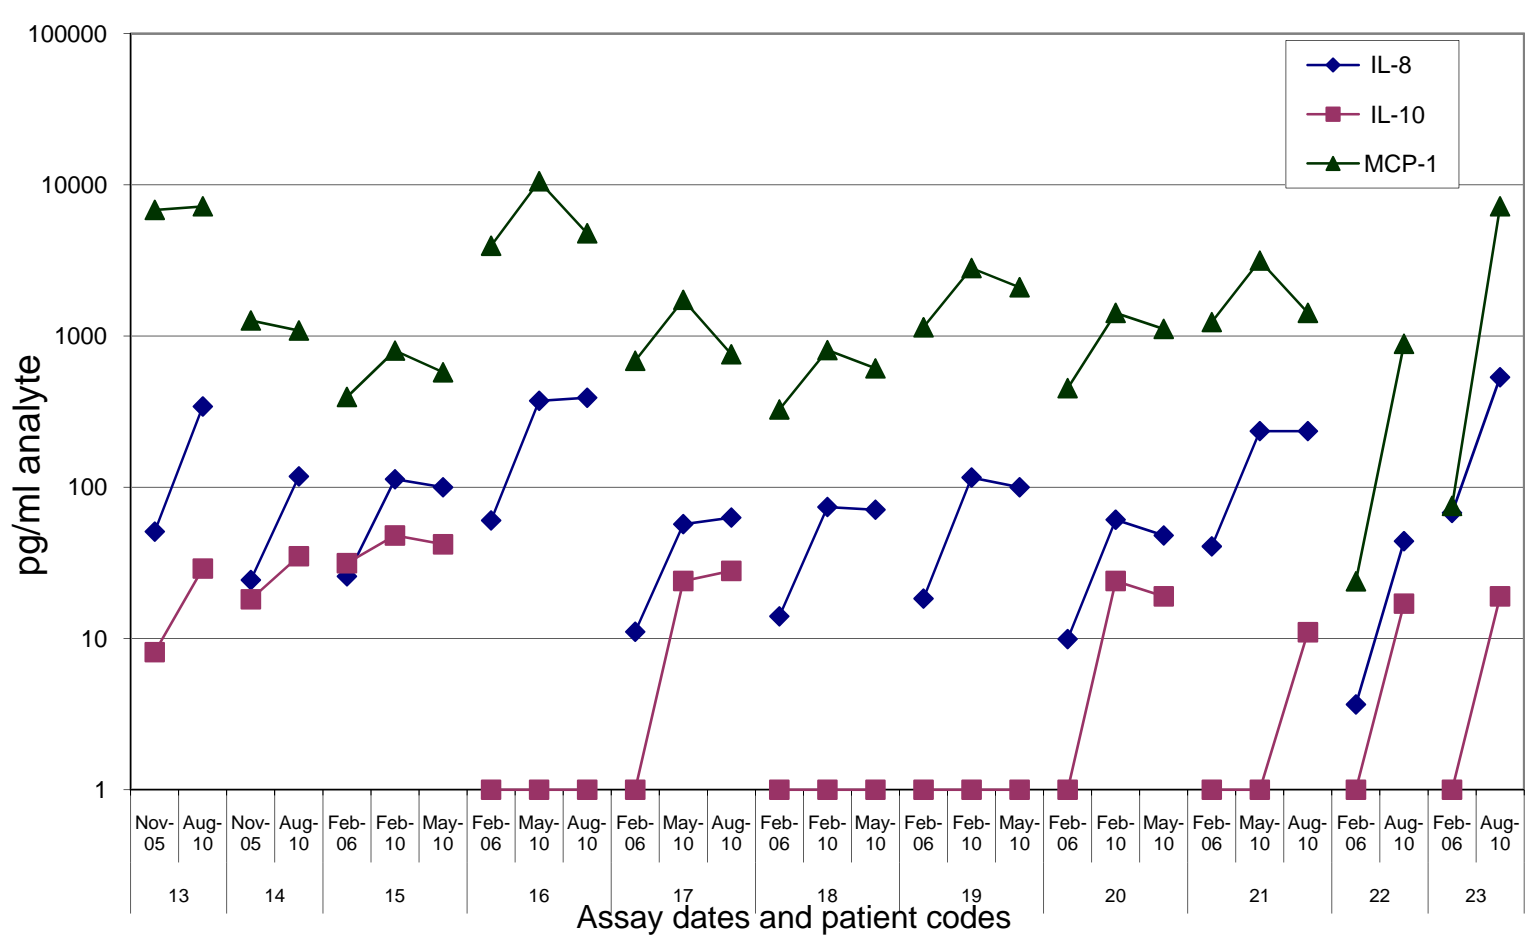

Supplement: MOESM5 [file 9577164]
